# Supplementary material for: Cost of Illness Analysis of Type 2 Diabetes Mellitus: The Findings from a Lower-Middle Income Country
Source: MDPI journal article supplement (doi:10.3390/ijerph191912611), 2022-10-02
Supplement: s1 [file s1]

## Questionnaire

**Title: Cost of diabetes care in out-patient clinics.**

*Personal identifier sheet*

|        |  |  |  |  |
|--------|--|--|--|--|
| ID No. |  |  |  |  |
|--------|--|--|--|--|

|   |                                          |   |                                  |             |  |  |  |   |                             |                |
|---|------------------------------------------|---|----------------------------------|-------------|--|--|--|---|-----------------------------|----------------|
| 1 | Gender                                   | 2 | Age<br>Yrs.                      | DOB (m/d/y) |  |  |  |   | 3                           | Marital status |
|   |                                          |   |                                  |             |  |  |  |   |                             |                |
| 4 | How identified as<br>Diabetic?           | 5 | Total time taken<br>in Interview |             |  |  |  | 6 | Date                        |                |
|   |                                          |   |                                  |             |  |  |  |   |                             |                |
| 7 | Language of<br>interview                 | 8 | Interviewer Name                 |             |  |  |  | 9 | Signature of<br>Interviewer |                |
|   | Urdu: _____<br>Other (specify):<br>_____ |   |                                  |             |  |  |  |   |                             |                |

|                      |
|----------------------|
| <u><b>Status</b></u> |
| Complete:            |
| Incomplete:          |

|                   |
|-------------------|
| <b>SUPERVISOR</b> |
| Checked:          |
| Validated:        |

***Socio-demographic and general information***

|        |  |  |  |  |
|--------|--|--|--|--|
| ID No. |  |  |  |  |
|--------|--|--|--|--|

| Q #    | Question                                                             | Code                   | Skip pattern      | Response |
|--------|----------------------------------------------------------------------|------------------------|-------------------|----------|
| Q # 1  | What is your current status of education?                            | Primary ..... 1        |                   |          |
|        |                                                                      | Secondary ..... 2      |                   |          |
|        |                                                                      | Intermediate ..... 3   |                   |          |
|        |                                                                      | Graduate & above..4    |                   |          |
|        |                                                                      | Madrasah ..... 5       |                   |          |
|        |                                                                      | Can read & write...6   |                   |          |
|        |                                                                      | Illiterate .....7      |                   |          |
|        |                                                                      | Other ..... 0          |                   |          |
| Q # 2  | What is your marital status?                                         | Single ..... 1         | If 1, go to Q # 4 |          |
|        |                                                                      | Married .....2         |                   |          |
|        |                                                                      | Other ..... 0          |                   |          |
| Q # 3  | How many alive children do you have?                                 | Actual (in numbers)    |                   |          |
| Q # 4  | What is your employment status?                                      | Office Job ..... 1     | If 4, Go to Q # 6 |          |
|        |                                                                      | Businessman ..... 2    |                   |          |
|        |                                                                      | Laborer ..... 3        |                   |          |
|        |                                                                      | Unemployed ..... 4     |                   |          |
|        |                                                                      | Other ..... 0          |                   |          |
| Q # 5  | What is your total monthly income?                                   | Actual (in Rs.)        | Now Go to Q # 8   |          |
| Q # 6  | Reason for not being employed?                                       | Jobless .....1         |                   |          |
|        |                                                                      | Student .....2         |                   |          |
|        |                                                                      | Housewife ..... 3      |                   |          |
|        |                                                                      | Retired .....4         |                   |          |
|        |                                                                      | Unable .....5          |                   |          |
|        |                                                                      | Other .... .....0      |                   |          |
| Q # 7  | If unemployed, what are your activities in most of the days of week? | Actual                 |                   |          |
| Q # 8  | What is overall household income?                                    | Actual (in Rs.)        |                   |          |
| Q # 9  | How many people are supported on this income?                        | Actual (in numbers)    |                   |          |
| Q # 10 | Do you own? (in your home)                                           |                        |                   |          |
|        | (a) Television                                                       | Yes.....1<br>No .....2 |                   |          |
|        | (b) Refrigerator                                                     | Yes.....1<br>No .....2 |                   |          |
|        | (c) Air Conditioned                                                  | Yes.....1<br>No .....2 |                   |          |
|        | (d) Motor-Cycle                                                      | Yes.....1<br>No .....2 |                   |          |
|        | (e) Washing Machine                                                  | Yes.....1<br>No .....2 |                   |          |
|        | (f) Computer                                                         | Yes.....1<br>No .....2 |                   |          |
|        | (g) Car                                                              | Yes.....1<br>No .....2 |                   |          |

**Health status and behaviour information**

|        |  |  |  |  |
|--------|--|--|--|--|
| ID No. |  |  |  |  |
|--------|--|--|--|--|

| Q #    | Question                                            | Code                   | Skip pattern       | Response |
|--------|-----------------------------------------------------|------------------------|--------------------|----------|
| Q # 11 | Since how long you have been diagnosed as diabetic? | Actual (Years)         |                    |          |
| Q # 12 | How often you visit to your doctor due to diabetes? | (Per Year)             |                    |          |
| Q # 13 | Do you follow the doctor's advice for?              |                        |                    |          |
|        | (a) Consultations                                   | Yes..... 1             | If 1, Go to Q # 15 |          |
|        |                                                     | No ..... 2             |                    |          |
|        | (b) Laboratory investigations                       | Yes..... 1             | If 1, Go to Q # 15 |          |
|        |                                                     | No ..... 2             |                    |          |
|        | (c) Taking medicines                                | Yes..... 1             | If 1, Go to Q # 15 |          |
|        |                                                     | No ..... 2             |                    |          |
|        | (c) Dietary Intake                                  | Yes..... 1             | If 1, Go to Q # 15 |          |
|        |                                                     | No ..... 2             |                    |          |
| Q # 14 | Why you do not follow Doctor's advice?              | No knowledge ...1      |                    |          |
|        |                                                     | No resources ..... 2   |                    |          |
|        |                                                     | No time ..... 3        |                    |          |
|        |                                                     | Other ..... 0          |                    |          |
| Q # 15 | How do you currently treat the diabetes?            | Diet plan/Exercise ..1 |                    |          |
|        |                                                     | Diabetes tablets ... 2 |                    |          |
|        |                                                     | Insulin ..... 3        |                    |          |
|        |                                                     | Combination ... . 4    |                    |          |
|        |                                                     | Other ..... 0          |                    |          |
| Q # 16 | Do you need someone to help in your diabetes care?  | Yes ..... 1            |                    |          |
|        |                                                     | No ..... 2             |                    |          |

***Co-morbidities/complications & treatment information***

|        |  |  |  |  |
|--------|--|--|--|--|
| ID No. |  |  |  |  |
|--------|--|--|--|--|

| Q #             | Question                                                                             | Code            | Skip pattern | Response |
|-----------------|--------------------------------------------------------------------------------------|-----------------|--------------|----------|
| Q # 17          | Please tell us about the co-morbidities / complication due to diabetes. Do you have? |                 |              |          |
|                 | (a) Hypertension                                                                     | Yes . . . . . 1 |              |          |
|                 |                                                                                      | No . . . . . 2  |              |          |
|                 | (b) Dyslipidemia                                                                     | Yes . . . . . 1 |              |          |
|                 |                                                                                      | No . . . . . 2  |              |          |
|                 | (c) Depression                                                                       | Yes . . . . . 1 |              |          |
|                 |                                                                                      | No . . . . . 2  |              |          |
|                 | (d) Heart disease                                                                    | Yes . . . . . 1 |              |          |
|                 |                                                                                      | No . . . . . 2  |              |          |
|                 | (e) Retinopathy                                                                      | Yes . . . . . 1 |              |          |
|                 |                                                                                      | No . . . . . 2  |              |          |
|                 | (f) Neuropathy                                                                       | Yes . . . . . 1 |              |          |
| No . . . . . 2  |                                                                                      |                 |              |          |
| (g) Nephropathy | Yes . . . . . 1                                                                      |                 |              |          |
|                 | No . . . . . 2                                                                       |                 |              |          |
| (h) Other _____ | Yes . . . . . 1                                                                      |                 |              |          |
|                 | No . . . . . 2                                                                       |                 |              |          |
| Q # 18          | Do you use medication for?                                                           |                 |              |          |
|                 | (a) Hypertension                                                                     | Yes . . . . . 1 |              |          |
|                 |                                                                                      | No . . . . . 2  |              |          |
|                 | (b) Dyslipidemia                                                                     | Yes . . . . . 1 |              |          |
|                 |                                                                                      | No . . . . . 2  |              |          |
|                 | (c) Depression                                                                       | Yes . . . . . 1 |              |          |
|                 |                                                                                      | No . . . . . 2  |              |          |
|                 | (d) Heart disease                                                                    | Yes . . . . . 1 |              |          |
|                 |                                                                                      | No . . . . . 2  |              |          |
|                 | (e) Retinopathy                                                                      | Yes . . . . . 1 |              |          |
|                 |                                                                                      | No . . . . . 2  |              |          |
|                 | (f) Neuropathy                                                                       | Yes . . . . . 1 |              |          |
|                 |                                                                                      | No . . . . . 2  |              |          |
|                 | (g) Nephropathy                                                                      | Yes . . . . . 1 |              |          |
|                 |                                                                                      | No . . . . . 2  |              |          |
|                 | (h) Other _____                                                                      | Yes . . . . . 1 |              |          |
|                 |                                                                                      | No . . . . . 2  |              |          |

***Treatment regime information***

|        |  |  |  |  |
|--------|--|--|--|--|
| ID No. |  |  |  |  |
|--------|--|--|--|--|

| Q #    | Question                                                                                     | Dose            | Frequency             | Expenses        |
|--------|----------------------------------------------------------------------------------------------|-----------------|-----------------------|-----------------|
| Q # 19 | Which medicines you use for diabetes and other co-morbidities / complications in last month? |                 |                       |                 |
|        | (a)                                                                                          |                 |                       |                 |
|        | (b)                                                                                          |                 |                       |                 |
|        | (c)                                                                                          |                 |                       |                 |
|        | (d)                                                                                          |                 |                       |                 |
|        | (e)                                                                                          |                 |                       |                 |
|        | (f)                                                                                          |                 |                       |                 |
|        | (g)                                                                                          |                 |                       |                 |
|        | (h)                                                                                          |                 |                       |                 |
|        | (i)                                                                                          |                 |                       |                 |
|        | (j)                                                                                          |                 |                       |                 |
|        | (k)                                                                                          |                 |                       |                 |
|        | (l)                                                                                          |                 |                       |                 |
|        | (m)                                                                                          |                 |                       |                 |
|        | (n)                                                                                          |                 |                       |                 |
| Q # 20 | Do you use insulin to treat your diabetes?                                                   | Yes . . . . . 1 | If 2, go to<br>Q # 22 |                 |
|        |                                                                                              | No . . . . . 2  |                       |                 |
| Q # 21 | Use of insulin?                                                                              | <b>Dose</b>     | <b>Frequency</b>      | <b>Expenses</b> |
|        |                                                                                              |                 |                       |                 |
|        |                                                                                              |                 |                       |                 |
|        |                                                                                              |                 |                       |                 |

**Diabetes cost information**

|        |  |  |  |  |
|--------|--|--|--|--|
| ID No. |  |  |  |  |
|--------|--|--|--|--|

| Q #    | Question                                                        | Code                          | Skip pattern       | Response |
|--------|-----------------------------------------------------------------|-------------------------------|--------------------|----------|
| Q # 22 | How much money you spent for?                                   | In current visit (In rupees)  |                    |          |
|        | (a) consultation                                                | Actual                        |                    |          |
|        | (b) lab tests                                                   | Actual                        |                    |          |
|        | (c) medicines                                                   | Actual                        |                    |          |
|        | (d) travel cost                                                 | Actual                        |                    |          |
|        | (e) food cost                                                   | Actual                        |                    |          |
|        | (f) other health care cost                                      | Actual                        |                    |          |
| Q # 23 | How much time you spent during?                                 | In current visit (in minutes) |                    |          |
|        | (a) Travelling to clinic                                        | Actual                        |                    |          |
|        | (b) Waiting in clinic                                           | Actual                        |                    |          |
|        | (c) Consultation                                                | Actual                        |                    |          |
| Q # 24 | For how long you take leave from your employer for each visit?  | 0 hours ..... 1               |                    |          |
|        |                                                                 | 1-2 hours ..... 2             |                    |          |
|        |                                                                 | 2-4 hours ..... 3             |                    |          |
|        |                                                                 | 1 day ..... 4                 |                    |          |
|        |                                                                 | Other ..... 0                 |                    |          |
| Q # 25 | Does anyone accompany you to the clinic?                        | Yes..... 1                    | If 2, go to Q # 28 |          |
|        |                                                                 | No ..... 2                    |                    |          |
| Q # 26 | What is his / her job?                                          | Office Job ..... 1            | If 4, go to Q # 28 |          |
|        |                                                                 | Businessman ..... 2           |                    |          |
|        |                                                                 | Laborer ..... 3               |                    |          |
|        |                                                                 | Unemployed ... 4              |                    |          |
|        |                                                                 | Other ..... 0                 |                    |          |
| Q # 27 | What is his/her monthly income?                                 | Actual                        |                    |          |
| Q # 28 | Because of cost, do you:                                        |                               |                    |          |
|        | (a) Skip a pill or insulin shot?                                | Yes..... 1<br>No ..... 2      |                    |          |
|        | (b) Skip checking your blood sugar?                             | Yes..... 1<br>No ..... 2      |                    |          |
|        | (c) Skip consultation?                                          | Yes..... 1<br>No ..... 2      |                    |          |
|        | (d) Other _____                                                 | Yes..... 1<br>No ..... 2      |                    |          |
|        |                                                                 |                               |                    |          |
|        |                                                                 |                               |                    |          |
| Q # 29 | Who is responsible for the finances of your diabetes treatment? | Self ..... 1                  |                    |          |
|        |                                                                 | Spouse ..... 2                |                    |          |
|        |                                                                 | Parent ..... 3                |                    |          |
|        |                                                                 | Brother/sister ..... 4        |                    |          |
|        |                                                                 | Son / Daughter ... 5          |                    |          |
|        |                                                                 | Employer ..... 6              |                    |          |
|        |                                                                 | Health insurance.. 7          |                    |          |
|        |                                                                 | Other ..... 0                 |                    |          |
| Q # 30 | Any extra information on expenses incurred due to diabetes?     | Actual                        |                    |          |
